# Supplementary material for: Ginkgo biloba Prevents Oxidative Stress-Induced Apoptosis Blocking p53 Activation in Neuroblastoma Cells
Source: PubMed Central journal article supplement (PMC7222193; doi:10.3390/antiox9040279), 2020-03-26
Supplement: antioxidants-09-00279-s001.pdf [file antioxidants-09-00279-s001.pdf]

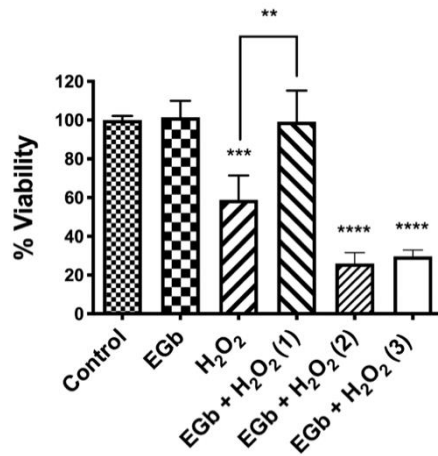

Figure S1. Cell viability after treatments with 25  $\mu$ g/mL of EGb, 75  $\mu$ M of H<sub>2</sub>O<sub>2</sub> or a combination of them. In EGb + H<sub>2</sub>O<sub>2</sub> (1) cells were treated for 24 h with EGb and then 24 h with H<sub>2</sub>O<sub>2</sub>. In EGb + H<sub>2</sub>O<sub>2</sub> (2) cells were treated with EGb and H<sub>2</sub>O<sub>2</sub> concurrent for 24 h. In EGb + H<sub>2</sub>O<sub>2</sub> (3) cells were treated for 24 h with H<sub>2</sub>O<sub>2</sub> and then with EGb for additional 24 h. The bars represent  $\pm$  the average  $\pm$  SD of independent experiments ( $n = 3$ ). Statistically significant difference compared to control cells: \*\* $p \leq 0.01$ , \*\*\* $p \leq 0.005$ , \*\*\*\* $p \leq 0.001$ . Cells treated with DMSO were used as control.

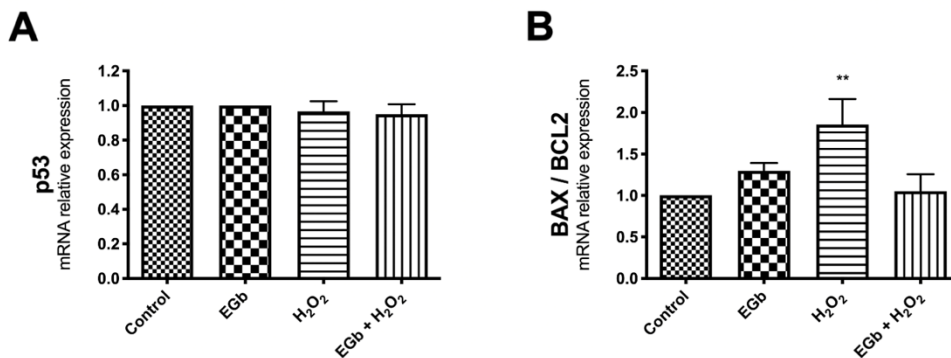

Figure S2. **q-PCR analysis.** Quantitative analysis of mRNA expression levels of p53, BAX and Bcl-2 in SK-N-BE cells after treatments. Histograms report the expression of p53 (**A**) and BAX/Bcl2 ratio (**B**). The bars represent  $\pm$  the average  $\pm$  SD of independent experiments ( $n = 3$ ). Statistically significant difference compared to control cells: \*\* $p \leq 0.01$ . Cells treated with DMSO were used as control.
